# Supplementary material for: Upgrading Biogas from Small Agricultural Sources into Biomethane by Membrane Separation
Source: MDPI journal article supplement (doi:10.3390/membranes11120938), 2021-11-27
Supplement: s1 [file s1]

# Supplementary Materials: Upgrading Biogas from Small Agricultural Sources into Biomethane by Membrane Separation

Aleksandra Janusz-Cygan, Jolanta Jaschik and Marek Tańczyk

**Table S1.** Results of the simulation of the biogas one-stage upgrade process with the polyimide membrane (UBE, UMS-A5).

| $p_F$ | A              | $V_{BM}$                             | [CH <sub>4</sub> ] | Recov-<br>ery<br>(CH <sub>4</sub> ) | $P_{S1}$         | $P_{S2}$         | $P_{BM}$         | Power<br>excess                                 | Mem-<br>brane<br>produc-<br>tivity | Specific<br>energy                     | Membrane<br>specific area              |
|-------|----------------|--------------------------------------|--------------------|-------------------------------------|------------------|------------------|------------------|-------------------------------------------------|------------------------------------|----------------------------------------|----------------------------------------|
| MPa   | m <sup>2</sup> | m <sup>3</sup> (STP) h <sup>-1</sup> | vol.%              | %                                   | kW <sub>el</sub> | kW <sub>el</sub> | kW <sub>th</sub> | kW <sub>th</sub> kW <sub>el</sub> <sup>-1</sup> | kW <sub>th</sub> m <sup>-2</sup>   | kW <sub>el</sub> m <sup>-3</sup> (STP) | m <sup>2</sup> h m <sup>-3</sup> (STP) |
| 0.4   | 12.70          | 1.45                                 | 96.02              | 53.38                               | 0.32             | 0                | 15.32            | 15.32                                           | 1.21                               | 0.22                                   | 8.78                                   |
| 0.6   | 4.95           | 1.90                                 | 96.02              | 70.13                               | 0.44             | 0                | 20.13            | 20.13                                           | 4.06                               | 0.23                                   | 2.61                                   |
| 0.8   | 2.63           | 2.11                                 | 96.02              | 78.03                               | 0.53             | 0                | 22.40            | 22.40                                           | 8.50                               | 0.25                                   | 1.25                                   |
| 1.0   | 1.65           | 2.23                                 | 96.03              | 82.47                               | 0.61             | 0                | 23.67            | 23.67                                           | 14.32                              | 0.27                                   | 0.74                                   |
| 1.2   | 1.15           | 2.31                                 | 96.04              | 85.24                               | 0.68             | 0                | 24.46            | 24.46                                           | 21.28                              | 0.29                                   | 0.50                                   |
| 1.4   | 0.84           | 2.36                                 | 96.00              | 87.30                               | 0.73             | 0                | 25.06            | 25.06                                           | 29.67                              | 0.31                                   | 0.36                                   |
| 1.6   | 0.66           | 2.40                                 | 96.03              | 88.58                               | 0.78             | 0                | 25.42            | 25.42                                           | 38.33                              | 0.33                                   | 0.28                                   |

**Table S2.** Results of the simulation of the biogas two-stage upgrade process with the polyimide membrane (UBE, UMS-A5) and the pressure in the first stage of the 0.4 MPa.

| $p_F$ | A              | $V_{BM}$                             | [CH <sub>4</sub> ] | Recov-<br>ery<br>(CH <sub>4</sub> ) | $P_{S1}$         | $P_{S2}$         | $P_{BM}$         | Power<br>excess                                 | Mem-<br>brane<br>produc-<br>tivity | Specific<br>energy                     | Membrane<br>specific area              |
|-------|----------------|--------------------------------------|--------------------|-------------------------------------|------------------|------------------|------------------|-------------------------------------------------|------------------------------------|----------------------------------------|----------------------------------------|
| MPa   | m <sup>2</sup> | m <sup>3</sup> (STP) h <sup>-1</sup> | vol.%              | %                                   | kW <sub>el</sub> | kW <sub>el</sub> | kW <sub>th</sub> | kW <sub>th</sub> kW <sub>el</sub> <sup>-1</sup> | kW <sub>th</sub> m <sup>-2</sup>   | kW <sub>el</sub> m <sup>-3</sup> (STP) | m <sup>2</sup> h m <sup>-3</sup> (STP) |
| 0.4   | 12.69          | 1.45                                 | 96.01              | 53.42                               | 0.32             | 0                | 15.33            | 47.28                                           | 1.21                               | 0.22                                   | 8.77                                   |
| 0.6   | 5.33           | 1.89                                 | 96.01              | 69.68                               | 0.32             | 0.06             | 20.00            | 51.89                                           | 3.75                               | 0.20                                   | 2.82                                   |
| 0.8   | 3.14           | 2.09                                 | 96.01              | 77.35                               | 0.32             | 0.11             | 22.20            | 51.31                                           | 7.06                               | 0.21                                   | 1.50                                   |
| 1.0   | 2.23           | 2.21                                 | 96.02              | 81.61                               | 0.32             | 0.15             | 23.42            | 49.65                                           | 10.49                              | 0.21                                   | 1.01                                   |
| 1.2   | 1.77           | 2.28                                 | 96.02              | 84.34                               | 0.32             | 0.18             | 24.21            | 47.89                                           | 13.71                              | 0.22                                   | 0.77                                   |
| 1.4   | 1.50           | 2.33                                 | 96.01              | 86.21                               | 0.32             | 0.21             | 24.74            | 46.24                                           | 16.55                              | 0.23                                   | 0.64                                   |

|     |      |      |       |       |      |      |       |       |       |      |      |
|-----|------|------|-------|-------|------|------|-------|-------|-------|------|------|
| 1.6 | 1.33 | 2.37 | 96.02 | 87.52 | 0.32 | 0.24 | 25.12 | 44.71 | 18.93 | 0.24 | 0.56 |
|-----|------|------|-------|-------|------|------|-------|-------|-------|------|------|

**Table S3.** Results of the simulation of the biogas two-stage upgrade process with the polyimide membrane (UBE, UMS-A5) and the pressure in the first stage of 0.6 MPa.

| $p_F$ | A              | $V_{BM}$                             | [CH <sub>4</sub> ] | Recov-<br>ery<br>(CH <sub>4</sub> ) | $P_{S1}$         | $P_{S2}$         | $P_{BM}$         | Power<br>excess                                 | Mem-<br>brane<br>produc-<br>tivity | Specific<br>energy                     | Membrane<br>specific area              |
|-------|----------------|--------------------------------------|--------------------|-------------------------------------|------------------|------------------|------------------|-------------------------------------------------|------------------------------------|----------------------------------------|----------------------------------------|
| MPa   | m <sup>2</sup> | m <sup>3</sup> (STP) h <sup>-1</sup> | vol.%              | %                                   | kW <sub>el</sub> | kW <sub>el</sub> | kW <sub>th</sub> | kW <sub>th</sub> kW <sub>el</sub> <sup>-1</sup> | kW <sub>th</sub> m <sup>-2</sup>   | kW <sub>el</sub> m <sup>-3</sup> (STP) | m <sup>2</sup> h m <sup>-3</sup> (STP) |
| 0.6   | 4.94           | 1.90                                 | 96.01              | 70.21                               | 0.44             | 0                | 20.15            | 45.52                                           | 4.08                               | 0.23                                   | 2.60                                   |
| 0.8   | 2.87           | 2.10                                 | 96.01              | 77.55                               | 0.44             | 0.04             | 22.26            | 46.42                                           | 7.75                               | 0.23                                   | 1.37                                   |
| 1.0   | 2.00           | 2.21                                 | 96.02              | 81.72                               | 0.44             | 0.07             | 23.45            | 45.99                                           | 11.71                              | 0.23                                   | 0.90                                   |
| 1.2   | 1.56           | 2.29                                 | 96.01              | 84.38                               | 0.44             | 0.09             | 24.22            | 45.16                                           | 15.54                              | 0.23                                   | 0.68                                   |
| 1.4   | 1.30           | 2.33                                 | 96.01              | 86.21                               | 0.44             | 0.12             | 24.74            | 44.23                                           | 19.00                              | 0.24                                   | 0.56                                   |
| 1.6   | 1.15           | 2.37                                 | 96.02              | 87.44                               | 0.44             | 0.14             | 25.10            | 43.26                                           | 21.88                              | 0.25                                   | 0.48                                   |

**Table S4.** Results of the simulation of the biogas two-stage upgrade process with the polyimide membrane (UBE, UMS-A5) and the pressure in the first stage of 0.8 MPa.

| $p_F$ | A              | $V_{BM}$                             | [CH <sub>4</sub> ] | Recov-<br>ery<br>(CH <sub>4</sub> ) | $P_{S1}$         | $P_{S2}$         | $P_{BM}$         | Power<br>excess                                 | Mem-<br>brane<br>produc-<br>tivity | Specific<br>energy                     | Membrane<br>specific area              |
|-------|----------------|--------------------------------------|--------------------|-------------------------------------|------------------|------------------|------------------|-------------------------------------------------|------------------------------------|----------------------------------------|----------------------------------------|
| MPa   | m <sup>2</sup> | m <sup>3</sup> (STP) h <sup>-1</sup> | vol.%              | %                                   | kW <sub>el</sub> | kW <sub>el</sub> | kW <sub>th</sub> | kW <sub>th</sub> kW <sub>el</sub> <sup>-1</sup> | kW <sub>th</sub> m <sup>-2</sup>   | kW <sub>el</sub> m <sup>-3</sup> (STP) | m <sup>2</sup> h m <sup>-3</sup> (STP) |
| 0.8   | 2.63           | 2.11                                 | 96.01              | 78.07                               | 0.53             | 0                | 22.41            | 41.94                                           | 8.52                               | 0.25                                   | 1.24                                   |
| 1.0   | 1.79           | 2.22                                 | 96.01              | 82.10                               | 0.53             | 0.03             | 23.56            | 42.00                                           | 13.13                              | 0.25                                   | 0.81                                   |
| 1.2   | 1.37           | 2.29                                 | 96.02              | 84.61                               | 0.53             | 0.05             | 24.28            | 41.58                                           | 17.67                              | 0.25                                   | 0.60                                   |
| 1.4   | 1.13           | 2.34                                 | 96.00              | 86.44                               | 0.53             | 0.07             | 24.81            | 41.05                                           | 22.04                              | 0.26                                   | 0.48                                   |
| 1.6   | 0.98           | 2.37                                 | 96.03              | 87.60                               | 0.53             | 0.09             | 25.14            | 40.38                                           | 25.69                              | 0.26                                   | 0.41                                   |

**Table S5.** Results of the simulation of the biogas one-stage upgrade process with the polysulfone membrane (Air Products, PRISM PA1020).

| $p_F$ | A              | $V_{BM}$                             | [CH <sub>4</sub> ] | Recov-<br>ery<br>(CH <sub>4</sub> ) | $P_{S1}$         | $P_{S2}$         | $P_{BM}$         | Power<br>excess                                 | Mem-<br>brane<br>produc-<br>tivity | Specific<br>energy                     | Membrane<br>specific area              |
|-------|----------------|--------------------------------------|--------------------|-------------------------------------|------------------|------------------|------------------|-------------------------------------------------|------------------------------------|----------------------------------------|----------------------------------------|
| MPa   | m <sup>2</sup> | m <sup>3</sup> (STP) h <sup>-1</sup> | vol. %             | %                                   | kW <sub>el</sub> | kW <sub>el</sub> | kW <sub>th</sub> | kW <sub>th</sub> kW <sub>el</sub> <sup>-1</sup> | kW <sub>th</sub> m <sup>-2</sup>   | kW <sub>el</sub> m <sup>-3</sup> (STP) | m <sup>2</sup> h m <sup>-3</sup> (STP) |
| 0.4   | 56.67          | 0.82                                 | 96.01              | 30.11                               | 0.32             | 0                | 8.64             | 26.64                                           | 0.15                               | 0.40                                   | 69.51                                  |
| 0.5   | 35.15          | 1.15                                 | 96.00              | 42.59                               | 0.39             | 0                | 12.22            | 31.51                                           | 0.35                               | 0.34                                   | 30.48                                  |
| 0.6   | 24.24          | 1.38                                 | 96.02              | 50.83                               | 0.44             | 0                | 14.59            | 32.96                                           | 0.60                               | 0.32                                   | 17.62                                  |
| 0.7   | 17.66          | 1.55                                 | 96.01              | 57.30                               | 0.49             | 0                | 16.45            | 33.50                                           | 0.93                               | 0.32                                   | 11.38                                  |
| 0.8   | 13.64          | 1.67                                 | 96.01              | 61.78                               | 0.53             | 0                | 17.73            | 33.19                                           | 1.30                               | 0.32                                   | 8.15                                   |
| 0.9   | 10.91          | 1.77                                 | 96.01              | 65.25                               | 0.57             | 0                | 18.73            | 32.64                                           | 1.72                               | 0.32                                   | 6.17                                   |
| 1.0   | 8.97           | 1.84                                 | 96.01              | 68.04                               | 0.61             | 0                | 19.53            | 32.01                                           | 2.18                               | 0.33                                   | 4.87                                   |
| 1.1   | 7.60           | 1.90                                 | 96.03              | 70.03                               | 0.64             | 0                | 20.10            | 31.22                                           | 2.64                               | 0.34                                   | 4.01                                   |
| 1.2   | 6.57           | 1.94                                 | 96.04              | 71.65                               | 0.68             | 0                | 20.57            | 30.46                                           | 3.13                               | 0.35                                   | 3.39                                   |

**Table S6.** Results of the simulation of the biogas two-stage upgrade process with the polysulfone membrane (Air Products, PRISM PA1020) and the pressure in the first stage of 0.4 MPa.

| $p_F$ | A              | $V_{BM}$                             | [CH <sub>4</sub> ] | Recov-<br>ery<br>(CH <sub>4</sub> ) | $P_{S1}$         | $P_{S2}$         | $P_{BM}$         | Power<br>excess                                 | Mem-<br>brane<br>produc-<br>tivity | Specific<br>energy                     | Membrane<br>specific area              |
|-------|----------------|--------------------------------------|--------------------|-------------------------------------|------------------|------------------|------------------|-------------------------------------------------|------------------------------------|----------------------------------------|----------------------------------------|
| MPa   | m <sup>2</sup> | m <sup>3</sup> (STP) h <sup>-1</sup> | vol. %             | %                                   | kW <sub>el</sub> | kW <sub>el</sub> | kW <sub>th</sub> | kW <sub>th</sub> kW <sub>el</sub> <sup>-1</sup> | kW <sub>th</sub> m <sup>-2</sup>   | kW <sub>el</sub> m <sup>-3</sup> (STP) | m <sup>2</sup> h m <sup>-3</sup> (STP) |
| 0.4   | 56.48          | 0.82                                 | 96.00              | 30.31                               | 0.32             | 0                | 8.70             | 26.82                                           | 0.15                               | 0.40                                   | 68.80                                  |
| 0.6   | 30.88          | 1.29                                 | 96.02              | 47.52                               | 0.32             | 0.05             | 13.64            | 36.83                                           | 0.44                               | 0.29                                   | 23.99                                  |
| 0.8   | 22.66          | 1.53                                 | 96.02              | 56.52                               | 0.32             | 0.08             | 16.22            | 39.96                                           | 0.72                               | 0.27                                   | 14.81                                  |
| 1.0   | 19.07          | 1.67                                 | 96.01              | 61.81                               | 0.32             | 0.11             | 17.74            | 40.74                                           | 0.93                               | 0.26                                   | 11.40                                  |
| 1.2   | 17.24          | 1.76                                 | 96.03              | 65.00                               | 0.32             | 0.14             | 18.66            | 40.49                                           | 1.08                               | 0.26                                   | 9.79                                   |

**Table S7.** Results of the simulation of the biogas two-stage upgrade process with the polysulfone membrane (Air Products, PRISM PA1020) and the pressure in the first stage of 0.6 MPa.

| $p_F$ | A              | $V_{BM}$                             | [CH <sub>4</sub> ] | Recov-<br>ery<br>(CH <sub>4</sub> ) | $P_{S1}$         | $P_{S2}$         | $P_{BM}$         | Power<br>excess                                 | Mem-<br>brane<br>produc-<br>tivity | Specific<br>energy                     | Membrane<br>specific area              |
|-------|----------------|--------------------------------------|--------------------|-------------------------------------|------------------|------------------|------------------|-------------------------------------------------|------------------------------------|----------------------------------------|----------------------------------------|
| MPa   | m <sup>2</sup> | m <sup>3</sup> (STP) h <sup>-1</sup> | vol.%              | %                                   | kW <sub>el</sub> | kW <sub>el</sub> | kW <sub>th</sub> | kW <sub>th</sub> kW <sub>el</sub> <sup>-1</sup> | kW <sub>th</sub> m <sup>-2</sup>   | kW <sub>el</sub> m <sup>-3</sup> (STP) | m <sup>2</sup> h m <sup>-3</sup> (STP) |
| 0.6   | 24.14          | 1.38                                 | 96.01              | 51.04                               | 0.44             | 0                | 14.65            | 33.09                                           | 0.61                               | 0.32                                   | 17.47                                  |
| 0.8   | 15.57          | 1.64                                 | 96.01              | 60.48                               | 0.44             | 0.03             | 17.36            | 36.44                                           | 1.11                               | 0.29                                   | 9.51                                   |
| 0.9   | 13.42          | 1.72                                 | 96.02              | 63.42                               | 0.44             | 0.05             | 18.20            | 37.09                                           | 1.36                               | 0.29                                   | 7.81                                   |
| 1.0   | 11.83          | 1.79                                 | 96.00              | 66.02                               | 0.44             | 0.06             | 18.95            | 37.58                                           | 1.60                               | 0.28                                   | 6.62                                   |
| 1.1   | 10.72          | 1.84                                 | 96.00              | 67.93                               | 0.44             | 0.07             | 19.50            | 37.74                                           | 1.82                               | 0.28                                   | 5.83                                   |
| 1.2   | 9.92           | 1.88                                 | 96.01              | 69.37                               | 0.44             | 0.09             | 19.91            | 37.70                                           | 2.01                               | 0.28                                   | 5.28                                   |

**Table S8.** Results of the simulation of the biogas two-stage upgrade process with the polysulfone membrane (Air Products, PRISM PA1020) and the pressure in the first stage of 0.8 MPa.

| $p_F$ | A              | $V_{BM}$                             | [CH <sub>4</sub> ] | Recov-<br>ery<br>(CH <sub>4</sub> ) | $P_{S1}$         | $P_{S2}$         | $P_{BM}$         | Power<br>excess                                 | Mem-<br>brane<br>produc-<br>tivity | Specific<br>energy                     | Membrane<br>specific area              |
|-------|----------------|--------------------------------------|--------------------|-------------------------------------|------------------|------------------|------------------|-------------------------------------------------|------------------------------------|----------------------------------------|----------------------------------------|
| MPa   | m <sup>2</sup> | m <sup>3</sup> (STP) h <sup>-1</sup> | vol.%              | %                                   | kW <sub>el</sub> | kW <sub>el</sub> | kW <sub>th</sub> | kW <sub>th</sub> kW <sub>el</sub> <sup>-1</sup> | kW <sub>th</sub> m <sup>-2</sup>   | kW <sub>el</sub> m <sup>-3</sup> (STP) | m <sup>2</sup> h m <sup>-3</sup> (STP) |
| 0.8   | 13.64          | 1.67                                 | 96.01              | 61.76                               | 0.53             | 0                | 17.73            | 33.18                                           | 1.30                               | 0.32                                   | 8.16                                   |
| 0.9   | 11.37          | 1.76                                 | 96.00              | 65.02                               | 0.53             | 0.01             | 18.66            | 34.40                                           | 1.64                               | 0.31                                   | 6.46                                   |
| 1.0   | 9.85           | 1.82                                 | 96.01              | 67.38                               | 0.53             | 0.02             | 19.34            | 35.12                                           | 1.96                               | 0.30                                   | 5.40                                   |
| 1.1   | 8.73           | 1.88                                 | 96.01              | 69.32                               | 0.53             | 0.02             | 19.90            | 35.61                                           | 2.28                               | 0.30                                   | 4.65                                   |
| 1.2   | 7.91           | 1.92                                 | 96.02              | 70.78                               | 0.53             | 0.03             | 20.31            | 35.87                                           | 2.57                               | 0.30                                   | 4.13                                   |
